# Supplementary material for: Beyond HCHO/NO₂: Global Daily Maps of Net Ozone Production Rates and Sensitivities Constrained by Satellite Observations (2005–2023)
Source: Copernicus journal article supplement (doi:10.5194/egusphere-2025-1679), 2025-05-15
Supplement: Supplementary file 1 [file egusphere-2025-1679-supplement.pdf]

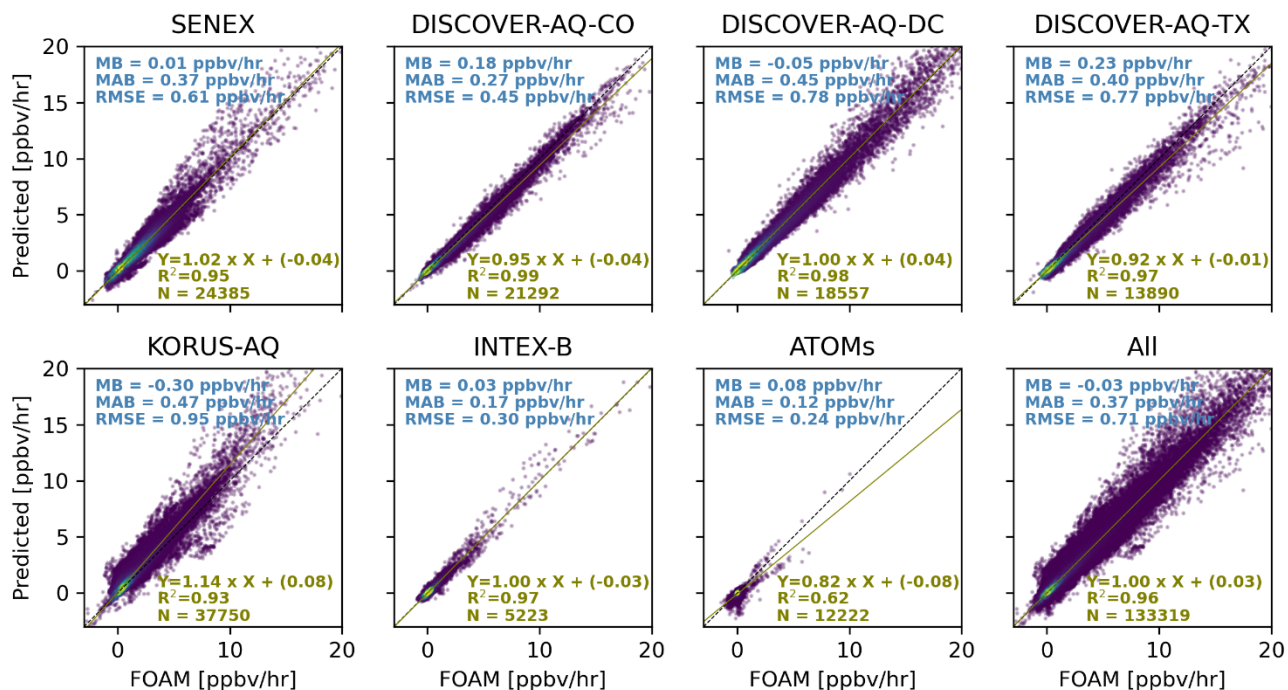

**Figure S1.** Scatterplots comparing observationally-constrained F0AM model  $\text{PO}_3$  and the predictions based on the DNN for the whole data (test+validation+training) from each air quality campaign. “All” denotes all test data.

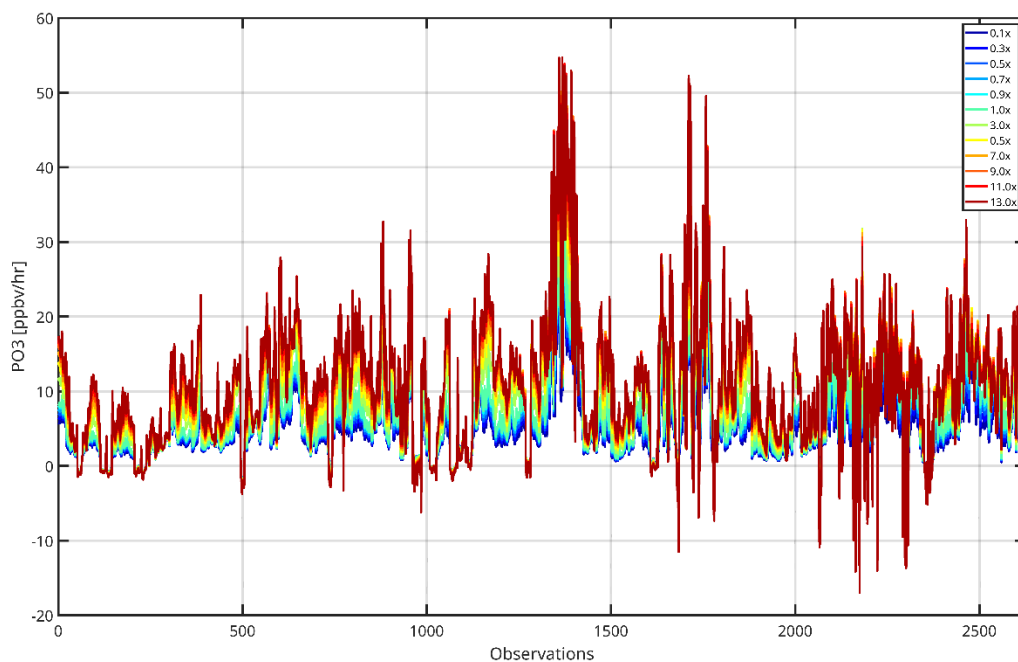

**Figure S2.** The effect of  $\text{H}_2\text{O}(\text{v})$  on  $\text{PO}_3$  during KORUS-AQ campaigns. Only highly polluted regions ( $\text{HCHO} \times \text{NO}_2 > 10$ ) are selected for this experiment.

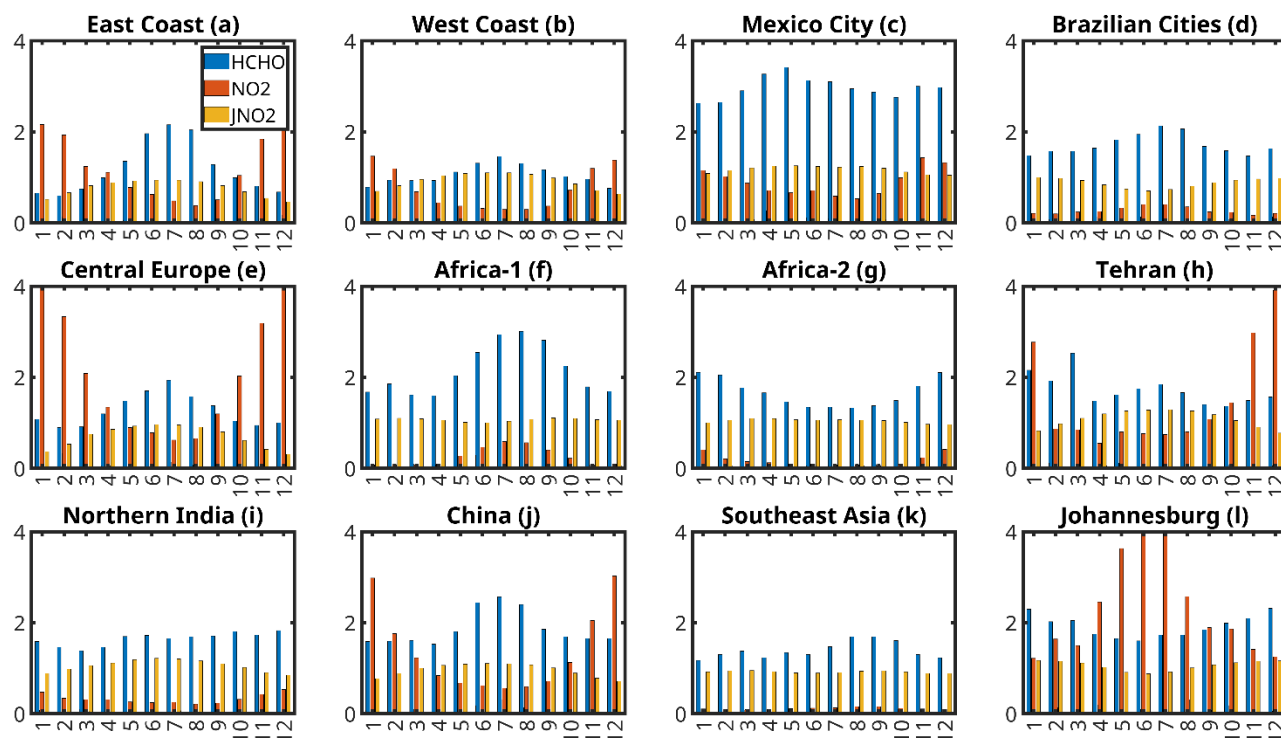

**Figure S3.** Absolute values of HCHO, NO<sub>2</sub>, and jNO<sub>2</sub> for several regions shown in Figure 7 in the main manuscript. These data are based on 2005-2007 time period. HCHO and NO<sub>2</sub> units are ppbv. jNO<sub>2</sub> is in  $1 \times 10^3/\text{s}$  unit.
